# Supplementary material for: Novel association between TGFA, TGFB1, IRF1, PTGS2 and IKBKB single-nucleotide polymorphisms and occurrence, severity and treatment response of major depressive disorder
Source: PeerJ. 2020 Feb 25;8:e8676. doi: 10.7717/peerj.8676 (PMC7047865; doi:10.7717/peerj.8676)
Supplement: Supplemental Information 3 [file peerj-08-8676-s003.xlsx]

## Sheet: Arkusz1
ID	Patient (1)/Control (0)	men (0)/women (1)	Age	Age of onset	Severity before therapy	Severity after therapy	Genotype of IKBKB rs5029748	GG_rs5029748	GT_rs5029748	TT_rs5029748	G_rs5029748	T_rs5029748	Genotype of IRF rs2070729	AA_rs2070729	AC_rs2070729	CC_rs2070729	A_rs2070729	C_rs2070729	Genotype of PTGS2 rs5275	AA_rs5275	AG_rs5275	GG_rs5275	A_rs5275	G_rs5275	Genotype of PTGS2 rs4648308	CC_rs4648308	CT_rs4648308	TT_rs4648308	C_rs4648308	T_rs4648308	Genotype of TGFa rs2166975	AA_rs2166975	AG_rs2166975	GG_rs2166975	A_rs2166975	G_rs2166975	Genotype of TGFb rs1800469	AA_rs1800469	AG_rs1800469	GG_rs1800469	A_rs1800469	G_rs1800469
SZKD1	0	0	56				GG	1	0	0	2	0	CC	0	0	1	0	2	AA	1	0	0	2	0		0	0	0	0	0	GG	0	0	1	0	2	AG	0	1	0	1	1
SZKD2	0	0	49				GG	1	0	0	2	0	AA	1	0	0	2	0	AG	0	1	0	1	1	CC	1	0	0	2	0	AA	1	0	0	2	0	GG	0	0	1	0	2
SZKD4	0	0	55				GG	1	0	0	2	0	CC	0	0	1	0	2	AA	1	0	0	2	0	CC	1	0	0	2	0	GG	0	0	1	0	2	AG	0	1	0	1	1
SZKD6	0	0	62										AA	1	0	0	2	0	AG	0	1	0	1	1	CC	1	0	0	2	0							GG	0	0	1	0	2
SZKD7	0	1	65				GG	1	0	0	2	0	CC	0	0	1	0	2	AG	0	1	0	1	1	CC	1	0	0	2	0	GG	0	0	1	0	2	AG	0	1	0	1	1
SZKD8	0	1	49				GG	1	0	0	2	0	AC	0	1	0	1	1	AG	0	1	0	1	1	CC	1	0	0	2	0	GG	0	0	1	0	2	GG	0	0	1	0	2
SZKD9	0	1	71				GG	1	0	0	2	0	CC	0	0	1	0	2	AA	1	0	0	2	0	CC	1	0	0	2	0	AG	0	1	0	1	1	AG	0	1	0	1	1
SZKD10	0	0	46				GG	1	0	0	2	0	AC	0	1	0	1	1	AG	0	1	0	1	1	CC	1	0	0	2	0	GG	0	0	1	0	2	GG	0	0	1	0	2
SZKD11	0	0	66				GG	1	0	0	2	0	AC	0	1	0	1	1	AG	0	1	0	1	1	CC	1	0	0	2	0	AG	0	1	0	1	1	AG	0	1	0	1	1
SZKD12	0	1	69				GG	1	0	0	2	0	CC	0	0	1	0	2	AA	1	0	0	2	0	CC	1	0	0	2	0	AG	0	1	0	1	1	GG	0	0	1	0	2
SZKD13	0	0	57				GG	1	0	0	2	0	AA	1	0	0	2	0	GG	0	0	1	0	2	CC	1	0	0	2	0	AA	1	0	0	2	0	AG	0	1	0	1	1
SZKD14	0	1	55				GG	1	0	0	2	0	AC	0	1	0	1	1	AG	0	1	0	1	1	CC	1	0	0	2	0	AG	0	1	0	1	1	AA	1	0	0	2	0
SZKD15	0	0	67				GT	0	1	0	1	1	AC	0	1	0	1	1	AA	1	0	0	2	0	CC	1	0	0	2	0	GG	0	0	1	0	2	GG	0	0	1	0	2
SZKD16	0	0	70				GT	0	1	0	1	1	CC	0	0	1	0	2	AA	1	0	0	2	0	CC	1	0	0	2	0	GG	0	0	1	0	2	AG	0	1	0	1	1
SZKD17	0	1	55				GG	1	0	0	2	0	AC	0	1	0	1	1	AA	1	0	0	2	0	CC	1	0	0	2	0	AG	0	1	0	1	1	AG	0	1	0	1	1
SZKD18	0	1	67				GG	1	0	0	2	0	AC	0	1	0	1	1	AA	1	0	0	2	0	CC	1	0	0	2	0	AA	1	0	0	2	0	AG	0	1	0	1	1
SZKD19	0	1	59				GG	1	0	0	2	0	AA	1	0	0	2	0	AG	0	1	0	1	1	CC	1	0	0	2	0	AG	0	1	0	1	1	AG	0	1	0	1	1
SZKD20	0	1	51				GG	1	0	0	2	0	AA	1	0	0	2	0	AG	0	1	0	1	1	CT	0	1	0	1	1	AG	0	1	0	1	1	GG	0	0	1	0	2
SZKD21	0	1	46				GG	1	0	0	2	0	CC	0	0	1	0	2	AG	0	1	0	1	1	CC	1	0	0	2	0	GG	0	0	1	0	2
SZKD22	0	1	59				GT	0	1	0	1	1	CC	0	0	1	0	2	AA	1	0	0	2	0	CC	1	0	0	2	0	AG	0	1	0	1	1	AG	0	1	0	1	1
SZKD23	0	1	72				GG	1	0	0	2	0	CC	0	0	1	0	2	AG	0	1	0	1	1	CC	1	0	0	2	0	GG	0	0	1	0	2	GG	0	0	1	0	2
SZKD24	0	0	49				TT	0	0	1	0	2	AC	0	1	0	1	1	AG	0	1	0	1	1	CT	0	1	0	1	1	GG	0	0	1	0	2	AG	0	1	0	1	1
SZKD25	0	0	66				GG	1	0	0	2	0	AC	0	1	0	1	1	AA	1	0	0	2	0	CC	1	0	0	2	0	AA	1	0	0	2	0	GG	0	0	1	0	2
SZKD26	0	1	72				GG	1	0	0	2	0	AC	0	1	0	1	1	AG	0	1	0	1	1	CT	0	1	0	1	1	AA	1	0	0	2	0	AA	1	0	0	2	0
SZKD27	0	0	51				GG	1	0	0	2	0	AC	0	1	0	1	1	AA	1	0	0	2	0	CC	1	0	0	2	0	GG	0	0	1	0	2	AG	0	1	0	1	1
SZKD28	0	1	50				GG	1	0	0	2	0	AA	1	0	0	2	0	AG	0	1	0	1	1	CC	1	0	0	2	0	GG	0	0	1	0	2	GG	0	0	1	0	2
SZKD30	0	1	39				GG	1	0	0	2	0	AC	0	1	0	1	1	AA	1	0	0	2	0	CC	1	0	0	2	0	GG	0	0	1	0	2	AA	1	0	0	2	0
SZKD31	0	0	58				GG	1	0	0	2	0	AC	0	1	0	1	1	AA	1	0	0	2	0	CC	1	0	0	2	0	AG	0	1	0	1	1	GG	0	0	1	0	2
SZKD32	0	0	45				GG	1	0	0	2	0	AA	1	0	0	2	0	AA	1	0	0	2	0							AG	0	1	0	1	1	GG	0	0	1	0	2
SZKD33	0	1	58				GG	1	0	0	2	0	CC	0	0	1	0	2	AG	0	1	0	1	1	CC	1	0	0	2	0	GG	0	0	1	0	2	AG	0	1	0	1	1
SZKD34	0	0	67				GG	1	0	0	2	0							AG	0	1	0	1	1	CT	0	1	0	1	1	GG	0	0	1	0	2	GG	0	0	1	0	2
SZKD35	0	0	57				GT	0	1	0	1	1	CC	0	0	1	0	2	AG	0	1	0	1	1	CC	1	0	0	2	0	AA	1	0	0	2	0	GG	0	0	1	0	2
SZKD36	0	1	33				GT	0	1	0	1	1	AC	0	1	0	1	1	AA	1	0	0	2	0	CC	1	0	0	2	0	GG	0	0	1	0	2	GG	0	0	1	0	2
SZKD37	0	0	61				GT	0	1	0	1	1	AC	0	1	0	1	1	AG	0	1	0	1	1							GG	0	0	1	0	2	AA	1	0	0	2	0
SZKD39	0	0	53				GG	1	0	0	2	0	CC	0	0	1	0	2	AA	1	0	0	2	0	CC	1	0	0	2	0	AG	0	1	0	1	1	GG	0	0	1	0	2
SZKD40	0	1	50				GG	1	0	0	2	0	AA	1	0	0	2	0	GG	0	0	1	0	2	CT	0	1	0	1	1	GG	0	0	1	0	2	AA	1	0	0	2	0
SZKD41	0	1	64				GG	1	0	0	2	0	AA	1	0	0	2	0	AA	1	0	0	2	0	CC	1	0	0	2	0	GG	0	0	1	0	2	GG	0	0	1	0	2
SZKD42	0	0	67				TT	0	0	1	0	2	CC	0	0	1	0	2	AG	0	1	0	1	1							GG	0	0	1	0	2	GG	0	0	1	0	2
SZKD43	0	0	63				GG	1	0	0	2	0	AA	1	0	0	2	0	GG	0	0	1	0	2	CT	0	1	0	1	1	GG	0	0	1	0	2	GG	0	0	1	0	2
SZKD44	0	0	47				GG	1	0	0	2	0	CC	0	0	1	0	2	AG	0	1	0	1	1	CC	1	0	0	2	0	AG	0	1	0	1	1	AA	1	0	0	2	0
SZKD45	0	0	39				GT	0	1	0	1	1	CC	0	0	1	0	2	GG	0	0	1	0	2	CT	0	1	0	1	1	GG	0	0	1	0	2	AG	0	1	0	1	1
SZKD46	0	1	66				GT	0	1	0	1	1	AC	0	1	0	1	1	AA	1	0	0	2	0	CC	1	0	0	2	0	GG	0	0	1	0	2	GG	0	0	1	0	2
SZKD47	0	1	63				GT	0	1	0	1	1	AC	0	1	0	1	1	AA	1	0	0	2	0	CC	1	0	0	2	0	GG	0	0	1	0	2	AA	1	0	0	2	0
SZKD48	0	1	69				GT	0	1	0	1	1	CC	0	0	1	0	2	AG	0	1	0	1	1	CC	1	0	0	2	0	GG	0	0	1	0	2	GG	0	0	1	0	2
SZKD51	0	1	63				GG	1	0	0	2	0	AC	0	1	0	1	1	AA	1	0	0	2	0	CC	1	0	0	2	0	AG	0	1	0	1	1	GG	0	0	1	0	2
SZKD52	0	1	71				TT	0	0	1	0	2	AC	0	1	0	1	1	GG	0	0	1	0	2							GG	0	0	1	0	2	GG	0	0	1	0	2
SZKD53	0	1	55				GG	1	0	0	2	0	AC	0	1	0	1	1	AG	0	1	0	1	1	CT	0	1	0	1	1	GG	0	0	1	0	2	GG	0	0	1	0	2
SZKD54	0	0	50				GG	1	0	0	2	0							AA	1	0	0	2	0	CC	1	0	0	2	0	GG	0	0	1	0	2	AG	0	1	0	1	1
SZKD55	0	1	63				GG	1	0	0	2	0	CC	0	0	1	0	2	AG	0	1	0	1	1	CC	1	0	0	2	0	GG	0	0	1	0	2	AG	0	1	0	1	1
SZKD56	0	0	67				GG	1	0	0	2	0	AC	0	1	0	1	1							CT	0	1	0	1	1	AG	0	1	0	1	1	GG	0	0	1	0	2
SZKD57	0	0	47				GT	0	1	0	1	1							AG	0	1	0	1	1	CT	0	1	0	1	1	GG	0	0	1	0	2
SZKD58	0	1	52				GG	1	0	0	2	0	CC	0	0	1	0	2	AA	1	0	0	2	0	CC	1	0	0	2	0	GG	0	0	1	0	2	GG	0	0	1	0	2
SZKD59	0	1	56				GG	1	0	0	2	0	AC	0	1	0	1	1	AG	0	1	0	1	1	CT	0	1	0	1	1	AG	0	1	0	1	1	AA	1	0	0	2	0
SZKD60	0	0	61										CC	0	0	1	0	2	AA	1	0	0	2	0	CC	1	0	0	2	0	GG	0	0	1	0	2	GG	0	0	1	0	2
SZKD61	0	0	66				GG	1	0	0	2	0	AC	0	1	0	1	1	AA	1	0	0	2	0	CC	1	0	0	2	0	AG	0	1	0	1	1	GG	0	0	1	0	2
SZKD62	0	1	63				TT	0	0	1	0	2	CC	0	0	1	0	2	GG	0	0	1	0	2	CT	0	1	0	1	1	GG	0	0	1	0	2	GG	0	0	1	0	2
SZKD63	0	0	52				GG	1	0	0	2	0	CC	0	0	1	0	2	AG	0	1	0	1	1	CC	1	0	0	2	0	GG	0	0	1	0	2	GG	0	0	1	0	2
SZKD64	0	0	67				GG	1	0	0	2	0	AA	1	0	0	2	0	GG	0	0	1	0	2	CC	1	0	0	2	0	AG	0	1	0	1	1	AG	0	1	0	1	1
SZKD65	0	0	50				GT	0	1	0	1	1	AC	0	1	0	1	1							CC	1	0	0	2	0	AG	0	1	0	1	1	AG	0	1	0	1	1
SZKD66	0	1	55				GT	0	1	0	1	1	AC	0	1	0	1	1	AA	1	0	0	2	0	CC	1	0	0	2	0	AG	0	1	0	1	1	AG	0	1	0	1	1
SZKD67	0	1	48				GG	1	0	0	2	0	AC	0	1	0	1	1	GG	0	0	1	0	2	CT	0	1	0	1	1	AA	1	0	0	2	0	AG	0	1	0	1	1
SZKD68	0	0	59				GT	0	1	0	1	1							AA	1	0	0	2	0	CC	1	0	0	2	0	GG	0	0	1	0	2	GG	0	0	1	0	2
SZKD69	0	0	55				GG	1	0	0	2	0	CC	0	0	1	0	2	AA	1	0	0	2	0	CC	1	0	0	2	0	AG	0	1	0	1	1	AG	0	1	0	1	1
SZKD70	0	1	69				GT	0	1	0	1	1	AA	1	0	0	2	0	AA	1	0	0	2	0	CC	1	0	0	2	0	AG	0	1	0	1	1	GG	0	0	1	0	2
SZKD71	0	0	64				GG	1	0	0	2	0	AC	0	1	0	1	1	GG	0	0	1	0	2	CC	1	0	0	2	0	AG	0	1	0	1	1	GG	0	0	1	0	2
SZKD72	0	0	66				GT	0	1	0	1	1	AA	1	0	0	2	0	AA	1	0	0	2	0	CC	1	0	0	2	0	AG	0	1	0	1	1	GG	0	0	1	0	2
SZKD73	0	1	69										AA	1	0	0	2	0	AG	0	1	0	1	1	CC	1	0	0	2	0	AA	1	0	0	2	0
SZKD74	0	0	60				GG	1	0	0	2	0	AA	1	0	0	2	0	GG	0	0	1	0	2	CT	0	1	0	1	1	AG	0	1	0	1	1	GG	0	0	1	0	2
SZKD75	0	0	47				GT	0	1	0	1	1	CC	0	0	1	0	2	GG	0	0	1	0	2	CC	1	0	0	2	0	GG	0	0	1	0	2	GG	0	0	1	0	2
SZKD76	0	0	54				TT	0	0	1	0	2	CC	0	0	1	0	2	GG	0	0	1	0	2	CC	1	0	0	2	0	AG	0	1	0	1	1	GG	0	0	1	0	2
SZKD77	0	1	57				GG	1	0	0	2	0	AC	0	1	0	1	1	AA	1	0	0	2	0	CC	1	0	0	2	0	AG	0	1	0	1	1	GG	0	0	1	0	2
SZKD78	0	1	52				GG	1	0	0	2	0	AA	1	0	0	2	0	AA	1	0	0	2	0	CC	1	0	0	2	0	GG	0	0	1	0	2	GG	0	0	1	0	2
SZKD79	0	0	47				TT	0	0	1	0	2	CC	0	0	1	0	2	AA	1	0	0	2	0	CC	1	0	0	2	0	GG	0	0	1	0	2	GG	0	0	1	0	2
SZKD80	0	0	59										AC	0	1	0	1	1	AA	1	0	0	2	0	CC	1	0	0	2	0	AG	0	1	0	1	1	GG	0	0	1	0	2
SZKD81	0	0	41				GT	0	1	0	1	1	AC	0	1	0	1	1	AG	0	1	0	1	1	CC	1	0	0	2	0	AG	0	1	0	1	1	GG	0	0	1	0	2
SZKD82	0	1	58										CC	0	0	1	0	2	GG	0	0	1	0	2	CC	1	0	0	2	0	AA	1	0	0	2	0	AA	1	0	0	2	0
SZKD83	0	1	50				GT	0	1	0	1	1	CC	0	0	1	0	2	AA	1	0	0	2	0	CC	1	0	0	2	0	GG	0	0	1	0	2	GG	0	0	1	0	2
SZKD84	0	0	55				GG	1	0	0	2	0	CC	0	0	1	0	2	AA	1	0	0	2	0	CC	1	0	0	2	0	AG	0	1	0	1	1	GG	0	0	1	0	2
SZKD85	0	1	73				GG	1	0	0	2	0	AC	0	1	0	1	1	AA	1	0	0	2	0	CC	1	0	0	2	0	GG	0	0	1	0	2	GG	0	0	1	0	2
SZKD86	0	1	67				GT	0	1	0	1	1	AA	1	0	0	2	0	AG	0	1	0	1	1	CC	1	0	0	2	0	AG	0	1	0	1	1	GG	0	0	1	0	2
SZKD87	0	0	65				GT	0	1	0	1	1	AA	1	0	0	2	0	GG	0	0	1	0	2	TT	0	0	1	0	2	GG	0	0	1	0	2	GG	0	0	1	0	2
SZKD88	0	0	51				GG	1	0	0	2	0	AC	0	1	0	1	1	AA	1	0	0	2	0	CC	1	0	0	2	0	GG	0	0	1	0	2	GG	0	0	1	0	2
SZKD89	0	0	75				GG	1	0	0	2	0	CC	0	0	1	0	2	AG	0	1	0	1	1	CT	0	1	0	1	1	GG	0	0	1	0	2	AA	1	0	0	2	0
SZKD90	0	1	58				GG	1	0	0	2	0	CC	0	0	1	0	2	AA	1	0	0	2	0	CC	1	0	0	2	0	GG	0	0	1	0	2	AG	0	1	0	1	1
SZKD91	0	1	71				GT	0	1	0	1	1	AC	0	1	0	1	1	AA	1	0	0	2	0	CC	1	0	0	2	0	AA	1	0	0	2	0	GG	0	0	1	0	2
SZKD92	0	0	67				GG	1	0	0	2	0	AA	1	0	0	2	0	AG	0	1	0	1	1	CT	0	1	0	1	1	GG	0	0	1	0	2	AA	1	0	0	2	0
SZKD93	0	0	47				GT	0	1	0	1	1	AA	1	0	0	2	0	AG	0	1	0	1	1	CC	1	0	0	2	0	AG	0	1	0	1	1	GG	0	0	1	0	2
SZKD94	0	0	49				GG	1	0	0	2	0	AC	0	1	0	1	1	AA	1	0	0	2	0	CC	1	0	0	2	0	GG	0	0	1	0	2	GG	0	0	1	0	2
SZKD95	0	1	55				GG	1	0	0	2	0	AC	0	1	0	1	1	AA	1	0	0	2	0	CC	1	0	0	2	0	GG	0	0	1	0	2	AG	0	1	0	1	1
SZKD96	0	1	51				GG	1	0	0	2	0	AA	1	0	0	2	0	AG	0	1	0	1	1	CC	1	0	0	2	0	AG	0	1	0	1	1	AA	1	0	0	2	0
SZKD97	0	0	66				GG	1	0	0	2	0	CC	0	0	1	0	2	AA	1	0	0	2	0							AA	1	0	0	2	0	AG	0	1	0	1	1
SZKD98	0	0	54																AA	1	0	0	2	0	CC	1	0	0	2	0	GG	0	0	1	0	2	AA	1	0	0	2	0
SZKD101	0	1	61										AA	1	0	0	2	0	AA	1	0	0	2	0	CC	1	0	0	2	0	AA	1	0	0	2	0
SZKD102	0	1	55				GG	1	0	0	2	0	AA	1	0	0	2	0							CC	1	0	0	2	0	AG	0	1	0	1	1	AG	0	1	0	1	1
SZKD103	0	1	70				GG	1	0	0	2	0	AC	0	1	0	1	1							CT	0	1	0	1	1	GG	0	0	1	0	2	AG	0	1	0	1	1
SZKD104	0	0	61				GG	1	0	0	2	0	AC	0	1	0	1	1	AG	0	1	0	1	1							AG	0	1	0	1	1
SZKD105	0	0	69				GG	1	0	0	2	0	AC	0	1	0	1	1	AA	1	0	0	2	0	CC	1	0	0	2	0	GG	0	0	1	0	2	GG	0	0	1	0	2
SZKD106	0	1	68				GG	1	0	0	2	0	CC	0	0	1	0	2	AA	1	0	0	2	0	CC	1	0	0	2	0	GG	0	0	1	0	2	AA	1	0	0	2	0
SZKD107	0	0	55				TT	0	0	1	0	2	CC	0	0	1	0	2	AG	0	1	0	1	1	CT	0	1	0	1	1	GG	0	0	1	0	2	GG	0	0	1	0	2
SZKD108	0	1	37				GT	0	1	0	1	1	CC	0	0	1	0	2	AG	0	1	0	1	1	CC	1	0	0	2	0	AA	1	0	0	2	0	AG	0	1	0	1	1
SZKD109	0	0	60				TT	0	0	1	0	2	AC	0	1	0	1	1	AA	1	0	0	2	0	CC	1	0	0	2	0	AA	1	0	0	2	0	AA	1	0	0	2	0
SZKD110	0	1	49				GG	1	0	0	2	0	AA	1	0	0	2	0	AG	0	1	0	1	1	CC	1	0	0	2	0	AG	0	1	0	1	1	AG	0	1	0	1	1
SZKD111	0	0	70				TT	0	0	1	0	2	AC	0	1	0	1	1	AA	1	0	0	2	0	CC	1	0	0	2	0	GG	0	0	1	0	2	AG	0	1	0	1	1
SZKD112	0	0	72				GG	1	0	0	2	0	AA	1	0	0	2	0	AG	0	1	0	1	1	CT	0	1	0	1	1	AA	1	0	0	2	0	AG	0	1	0	1	1
SZKD114	0	0	68				TT	0	0	1	0	2	AC	0	1	0	1	1	AG	0	1	0	1	1	CT	0	1	0	1	1	AG	0	1	0	1	1	AG	0	1	0	1	1
SZKD115	0	1	58				TT	0	0	1	0	2	AC	0	1	0	1	1	GG	0	0	1	0	2	CC	1	0	0	2	0	AA	1	0	0	2	0	GG	0	0	1	0	2
SZKD116	0	0	59				GG	1	0	0	2	0	CC	0	0	1	0	2	AA	1	0	0	2	0	CC	1	0	0	2	0	AG	0	1	0	1	1	GG	0	0	1	0	2
SZKD117	0	0	64				GG	1	0	0	2	0	AA	1	0	0	2	0	AA	1	0	0	2	0	TT	0	0	1	0	2	GG	0	0	1	0	2	GG	0	0	1	0	2
SZKD118	0	0	43				TT	0	0	1	0	2	AC	0	1	0	1	1	GG	0	0	1	0	2	CC	1	0	0	2	0	GG	0	0	1	0	2	AG	0	1	0	1	1
SZKD119	0	0	55				TT	0	0	1	0	2	CC	0	0	1	0	2	GG	0	0	1	0	2	CC	1	0	0	2	0	GG	0	0	1	0	2	AA	1	0	0	2	0
SZKD120	0	0	59				GG	1	0	0	2	0	AC	0	1	0	1	1	GG	0	0	1	0	2	CC	1	0	0	2	0	AA	1	0	0	2	0	AG	0	1	0	1	1
SZKD121	0	1	66				TT	0	0	1	0	2	CC	0	0	1	0	2	AG	0	1	0	1	1	CT	0	1	0	1	1	GG	0	0	1	0	2	AG	0	1	0	1	1
SZKD122	0	1	63				GG	1	0	0	2	0	AC	0	1	0	1	1	AG	0	1	0	1	1	CT	0	1	0	1	1	AG	0	1	0	1	1	GG	0	0	1	0	2
SZKD123	0	0	62				GG	1	0	0	2	0	AC	0	1	0	1	1	AG	0	1	0	1	1	CC	1	0	0	2	0	AG	0	1	0	1	1	GG	0	0	1	0	2
SZKD124	0	0	44				TT	0	0	1	0	2	AC	0	1	0	1	1	AG	0	1	0	1	1	CT	0	1	0	1	1	AG	0	1	0	1	1	AG	0	1	0	1	1
SZKD125	0	1	56				GG	1	0	0	2	0	CC	0	0	1	0	2	AG	0	1	0	1	1	CC	1	0	0	2	0	GG	0	0	1	0	2	AG	0	1	0	1	1
SZKD126	0	1	51				TT	0	0	1	0	2	AA	1	0	0	2	0	AA	1	0	0	2	0	CC	1	0	0	2	0	GG	0	0	1	0	2	GG	0	0	1	0	2
SZKD127	0	0	48				TT	0	0	1	0	2	AC	0	1	0	1	1	AA	1	0	0	2	0	CC	1	0	0	2	0	AA	1	0	0	2	0	AG	0	1	0	1	1
SZKD128	0	1	37				TT	0	0	1	0	2	CC	0	0	1	0	2	AA	1	0	0	2	0	CC	1	0	0	2	0	GG	0	0	1	0	2	AG	0	1	0	1	1
SZKD129	0	0	39				GG	1	0	0	2	0	AC	0	1	0	1	1	AG	0	1	0	1	1	CT	0	1	0	1	1	GG	0	0	1	0	2	AG	0	1	0	1	1
SZKD130	0	1	50				GT	0	1	0	1	1	AC	0	1	0	1	1	AA	1	0	0	2	0	CC	1	0	0	2	0	AG	0	1	0	1	1	GG	0	0	1	0	2
SZKD131	0	0	62				GT	0	1	0	1	1	AA	1	0	0	2	0	AG	0	1	0	1	1	CC	1	0	0	2	0	GG	0	0	1	0	2	AG	0	1	0	1	1
SZKD132	0	0	74				GG	1	0	0	2	0	CC	0	0	1	0	2	AG	0	1	0	1	1	CT	0	1	0	1	1	GG	0	0	1	0	2	AG	0	1	0	1	1
SZKD134	0	1	69				TT	0	0	1	0	2	AA	1	0	0	2	0	AG	0	1	0	1	1	CC	1	0	0	2	0	AG	0	1	0	1	1	AA	1	0	0	2	0
SZKD136	0	1	63				TT	0	0	1	0	2	CC	0	0	1	0	2	AA	1	0	0	2	0	CC	1	0	0	2	0	AG	0	1	0	1	1	AA	1	0	0	2	0
SZKD137	0	0	52				GG	1	0	0	2	0	CC	0	0	1	0	2	AA	1	0	0	2	0	CC	1	0	0	2	0	AG	0	1	0	1	1	AG	0	1	0	1	1
SZKD138	0	0	61				GG	1	0	0	2	0	CC	0	0	1	0	2	AA	1	0	0	2	0	CC	1	0	0	2	0	AA	1	0	0	2	0	GG	0	0	1	0	2
SZKD139	0	1	43				GT	0	1	0	1	1	CC	0	0	1	0	2	AA	1	0	0	2	0	CC	1	0	0	2	0	GG	0	0	1	0	2	GG	0	0	1	0	2
SZKD140	0	1	54				GG	1	0	0	2	0	AA	1	0	0	2	0	AA	1	0	0	2	0	CC	1	0	0	2	0	AG	0	1	0	1	1	GG	0	0	1	0	2
SZKD141	0	0	59				GG	1	0	0	2	0	CC	0	0	1	0	2	GG	0	0	1	0	2	CT	0	1	0	1	1	GG	0	0	1	0	2	GG	0	0	1	0	2
SZKD142	0	0	49				GG	1	0	0	2	0	AC	0	1	0	1	1	AG	0	1	0	1	1	CC	1	0	0	2	0	GG	0	0	1	0	2	AG	0	1	0	1	1
SZKD143	0	0	55				GT	0	1	0	1	1	CC	0	0	1	0	2	AG	0	1	0	1	1	CC	1	0	0	2	0	GG	0	0	1	0	2	GG	0	0	1	0	2
SZKD144	0	0	61				GG	1	0	0	2	0	AC	0	1	0	1	1	AG	0	1	0	1	1	CC	1	0	0	2	0	AG	0	1	0	1	1	GG	0	0	1	0	2
SZKD145	0	0	66				GG	1	0	0	2	0	CC	0	0	1	0	2	AA	1	0	0	2	0	CC	1	0	0	2	0	AG	0	1	0	1	1	AG	0	1	0	1	1
SZKD146	0	1	62				TT	0	0	1	0	2	CC	0	0	1	0	2	AG	0	1	0	1	1	CT	0	1	0	1	1	AA	1	0	0	2	0	GG	0	0	1	0	2
SZKD147	0	1	71				GG	1	0	0	2	0	CC	0	0	1	0	2	AG	0	1	0	1	1	CC	1	0	0	2	0	AG	0	1	0	1	1	AG	0	1	0	1	1
SZKD148	0	1	57				GG	1	0	0	2	0	CC	0	0	1	0	2	AG	0	1	0	1	1	CT	0	1	0	1	1	AA	1	0	0	2	0	GG	0	0	1	0	2
SZKD149	0	1	51				GG	1	0	0	2	0	AC	0	1	0	1	1	AG	0	1	0	1	1	CC	1	0	0	2	0	GG	0	0	1	0	2	GG	0	0	1	0	2
SZKD150	0	0	74				TT	0	0	1	0	2	AC	0	1	0	1	1	AA	1	0	0	2	0	CT	0	1	0	1	1	AA	1	0	0	2	0	GG	0	0	1	0	2
SZKD151	0	1	48				GT	0	1	0	1	1	AC	0	1	0	1	1	AG	0	1	0	1	1	CC	1	0	0	2	0	GG	0	0	1	0	2	GG	0	0	1	0	2
SZKD152	0	0	37				GG	1	0	0	2	0	CC	0	0	1	0	2	AG	0	1	0	1	1	CT	0	1	0	1	1	AA	1	0	0	2	0	AA	1	0	0	2	0
SZKD154	0	0	55				TT	0	0	1	0	2	AC	0	1	0	1	1	GG	0	0	1	0	2	TT	0	0	1	0	2	GG	0	0	1	0	2	AG	0	1	0	1	1
SZKD155	0	0	69				TT	0	0	1	0	2	AC	0	1	0	1	1	AA	1	0	0	2	0	CC	1	0	0	2	0	AG	0	1	0	1	1	AG	0	1	0	1	1
SZKD156	0	1	64				GG	1	0	0	2	0	AC	0	1	0	1	1	AG	0	1	0	1	1	CC	1	0	0	2	0	GG	0	0	1	0	2	AG	0	1	0	1	1
SZKD157	0	0	70				GG	1	0	0	2	0	AC	0	1	0	1	1	AA	1	0	0	2	0	CC	1	0	0	2	0	GG	0	0	1	0	2	AA	1	0	0	2	0
SZKD158	0	1	58				GG	1	0	0	2	0	CC	0	0	1	0	2	AA	1	0	0	2	0	CC	1	0	0	2	0	GG	0	0	1	0	2	GG	0	0	1	0	2
SZKD159	0	0	52				GG	1	0	0	2	0	CC	0	0	1	0	2	AA	1	0	0	2	0	CC	1	0	0	2	0	AG	0	1	0	1	1	AG	0	1	0	1	1
SZKD160	0	1	48				GG	1	0	0	2	0	CC	0	0	1	0	2	AA	1	0	0	2	0	CC	1	0	0	2	0	AG	0	1	0	1	1	AG	0	1	0	1	1
SZKD161	0	0	66				GG	1	0	0	2	0	AC	0	1	0	1	1	GG	0	0	1	0	2	CC	1	0	0	2	0	GG	0	0	1	0	2	GG	0	0	1	0	2
SZKD162	0	0	58				GG	1	0	0	2	0	AC	0	1	0	1	1	AG	0	1	0	1	1	CT	0	1	0	1	1	AA	1	0	0	2	0	GG	0	0	1	0	2
SZKD163	0	1	61				GG	1	0	0	2	0	AA	1	0	0	2	0	AG	0	1	0	1	1	CT	0	1	0	1	1	GG	0	0	1	0	2	AG	0	1	0	1	1
SZKD164	0	0	65				TT	0	0	1	0	2	CC	0	0	1	0	2	AG	0	1	0	1	1	CT	0	1	0	1	1	GG	0	0	1	0	2	AA	1	0	0	2	0
SZKD165	0	0	67				GG	1	0	0	2	0	AC	0	1	0	1	1	AG	0	1	0	1	1	CT	0	1	0	1	1	AG	0	1	0	1	1	AG	0	1	0	1	1
SZKD166	0	1	45				TT	0	0	1	0	2	AA	1	0	0	2	0	AA	1	0	0	2	0	CC	1	0	0	2	0	GG	0	0	1	0	2	AG	0	1	0	1	1
SZKD167	0	1	68				GG	1	0	0	2	0	AA	1	0	0	2	0	AG	0	1	0	1	1	CC	1	0	0	2	0	GG	0	0	1	0	2	GG	0	0	1	0	2
SZKD168	0	0	57				GT	0	1	0	1	1	CC	0	0	1	0	2	AA	1	0	0	2	0	CC	1	0	0	2	0	GG	0	0	1	0	2	GG	0	0	1	0	2
SZKD169	0	1	61				GT	0	1	0	1	1	CC	0	0	1	0	2	AA	1	0	0	2	0	CC	1	0	0	2	0	GG	0	0	1	0	2	AG	0	1	0	1	1
SZKD170	0	0	44				GT	0	1	0	1	1	AA	1	0	0	2	0	AG	0	1	0	1	1	CT	0	1	0	1	1	GG	0	0	1	0	2	AG	0	1	0	1	1
SZKD171	0	1	57				GT	0	1	0	1	1	AC	0	1	0	1	1	AA	1	0	0	2	0	CC	1	0	0	2	0	AG	0	1	0	1	1	GG	0	0	1	0	2
SZKD172	0	0	37				GG	1	0	0	2	0	AC	0	1	0	1	1	AA	1	0	0	2	0	CC	1	0	0	2	0	AG	0	1	0	1	1	AG	0	1	0	1	1
SZKD173	0	1	43				GT	0	1	0	1	1	AC	0	1	0	1	1	AG	0	1	0	1	1	CC	1	0	0	2	0	GG	0	0	1	0	2	AG	0	1	0	1	1
SZKD174	0	1	29				GT	0	1	0	1	1	CC	0	0	1	0	2	AA	1	0	0	2	0	CC	1	0	0	2	0	GG	0	0	1	0	2	AG	0	1	0	1	1
SZKD175	0	0	44				TT	0	0	1	0	2	AC	0	1	0	1	1	AA	1	0	0	2	0	CC	1	0	0	2	0	GG	0	0	1	0	2	AG	0	1	0	1	1
SZKD176	0	0	58				GG	1	0	0	2	0	AC	0	1	0	1	1	AG	0	1	0	1	1	CT	0	1	0	1	1	AG	0	1	0	1	1	AG	0	1	0	1	1
SZKD177	0	1	51				GT	0	1	0	1	1	CC	0	0	1	0	2	AG	0	1	0	1	1	CC	1	0	0	2	0	GG	0	0	1	0	2	AG	0	1	0	1	1
SZKD178	0	0	29				GG	1	0	0	2	0	AC	0	1	0	1	1	AG	0	1	0	1	1	CC	1	0	0	2	0	GG	0	0	1	0	2	GG	0	0	1	0	2
SZKD179	0	0	67				GG	1	0	0	2	0	CC	0	0	1	0	2	AA	1	0	0	2	0	CC	1	0	0	2	0	GG	0	0	1	0	2	AG	0	1	0	1	1
SZKD180	0	1	55				GG	1	0	0	2	0	AC	0	1	0	1	1	GG	0	0	1	0	2	CT	0	1	0	1	1	GG	0	0	1	0	2	AG	0	1	0	1	1
SZKD181	0	0	37				GG	1	0	0	2	0	AC	0	1	0	1	1	AG	0	1	0	1	1	CC	1	0	0	2	0	GG	0	0	1	0	2	AA	1	0	0	2	0
SZKD182	0	1	45				TT	0	0	1	0	2							GG	0	0	1	0	2	TT	0	0	1	0	2	GG	0	0	1	0	2
SZKD183	0	1	55				GG	1	0	0	2	0	AC	0	1	0	1	1	AA	1	0	0	2	0	CC	1	0	0	2	0	AG	0	1	0	1	1	GG	0	0	1	0	2
SZKD184	0	0	37				GG	1	0	0	2	0	AA	1	0	0	2	0	GG	0	0	1	0	2	CC	1	0	0	2	0	GG	0	0	1	0	2	GG	0	0	1	0	2
SZKD185	0	0	60				GG	1	0	0	2	0	CC	0	0	1	0	2	AG	0	1	0	1	1	CT	0	1	0	1	1	AG	0	1	0	1	1	AG	0	1	0	1	1
SZKD186	0	1	59				GG	1	0	0	2	0	CC	0	0	1	0	2	AG	0	1	0	1	1	CT	0	1	0	1	1	GG	0	0	1	0	2	GG	0	0	1	0	2
SZKD187	0	0	47				GG	1	0	0	2	0							GG	0	0	1	0	2	TT	0	0	1	0	2	GG	0	0	1	0	2	AG	0	1	0	1	1
SZKD188	0	1	38				TT	0	0	1	0	2	AA	1	0	0	2	0	AA	1	0	0	2	0	CC	1	0	0	2	0	AA	1	0	0	2	0	GG	0	0	1	0	2
SZKD189	0	0	44				GT	0	1	0	1	1	AC	0	1	0	1	1	AG	0	1	0	1	1	CT	0	1	0	1	1	GG	0	0	1	0	2	AG	0	1	0	1	1
SZKD190	0	0	69				GG	1	0	0	2	0	CC	0	0	1	0	2	AA	1	0	0	2	0	CC	1	0	0	2	0	GG	0	0	1	0	2	AG	0	1	0	1	1
SZKD191	0	0	57				GG	1	0	0	2	0	AA	1	0	0	2	0	AG	0	1	0	1	1	CC	1	0	0	2	0	AG	0	1	0	1	1	AG	0	1	0	1	1
SZKD192	0	0	69				GG	1	0	0	2	0	AC	0	1	0	1	1	AG	0	1	0	1	1	CC	1	0	0	2	0	GG	0	0	1	0	2	AG	0	1	0	1	1
SZKD193	0	1	62				GT	0	1	0	1	1	AC	0	1	0	1	1	GG	0	0	1	0	2	TT	0	0	1	0	2	AA	1	0	0	2	0	GG	0	0	1	0	2
SZKD194	0	1	44				TT	0	0	1	0	2							GG	0	0	1	0	2	TT	0	0	1	0	2	GG	0	0	1	0	2	AA	1	0	0	2	0
SZKD195	0	1	37				TT	0	0	1	0	2							AA	1	0	0	2	0	TT	0	0	1	0	2	GG	0	0	1	0	2
SZKD196	0	0	39				TT	0	0	1	0	2							GG	0	0	1	0	2	TT	0	0	1	0	2	GG	0	0	1	0	2	AG	0	1	0	1	1
SZKD197	0	0	73				TT	0	0	1	0	2							GG	0	0	1	0	2	TT	0	0	1	0	2	GG	0	0	1	0	2
SZKD198	0	1	62				TT	0	0	1	0	2							GG	0	0	1	0	2	TT	0	0	1	0	2	AA	1	0	0	2	0
SZKD199	0	0	53				TT	0	0	1	0	2							GG	0	0	1	0	2	TT	0	0	1	0	2	GG	0	0	1	0	2
SZKD200	0	1	55				TT	0	0	1	0	2							GG	0	0	1	0	2	TT	0	0	1	0	2	GG	0	0	1	0	2
SZKD208	0	1	59				GT	0	1	0	1	1	AC	0	1	0	1	1	AA	1	0	0	2	0	CC	1	0	0	2	0	GG	0	0	1	0	2	GG	0	0	1	0	2
SZKD211	0	0	49				GT	0	1	0	1	1	CC	0	0	1	0	2	AG	0	1	0	1	1	CC	1	0	0	2	0	AG	0	1	0	1	1	GG	0	0	1	0	2
SZKD215	0	0	55				GG	1	0	0	2	0	AC	0	1	0	1	1	GG	0	0	1	0	2	TT	0	0	1	0	2	GG	0	0	1	0	2	GG	0	0	1	0	2
SZD1	1	1	34	21	26	9	GG	1	0	0	2	0	CC	0	0	1	0	2	GG	0	0	1	0	2	CT	0	1	0	1	1	AG	0	1	0	1	1	AA	1	0	0	2	0
SZD2	1	1	47	33	14	3	GG	1	0	0	2	0	CC	0	0	1	0	2	AG	0	1	0	1	1	CC	1	0	0	2	0	GG	0	0	1	0	2	AA	1	0	0	2	0
SZD3	1	0	58	30	20	8	GG	1	0	0	2	0	AC	0	1	0	1	1	AG	0	1	0	1	1	CC	1	0	0	2	0	AG	0	1	0	1	1	AA	1	0	0	2	0
SZD4	1	0	21	21	16	4	GG	1	0	0	2	0	CC	0	0	1	0	2	AG	0	1	0	1	1	CC	1	0	0	2	0	GG	0	0	1	0	2	AA	1	0	0	2	0
SZD5	1	0	48	29	15	4	GG	1	0	0	2	0	AC	0	1	0	1	1	AA	1	0	0	2	0	CC	1	0	0	2	0	GG	0	0	1	0	2	AG	0	1	0	1	1
SZD8	1	0	20	20	22	6	GG	1	0	0	2	0	AC	0	1	0	1	1	AG	0	1	0	1	1	CC	1	0	0	2	0	GG	0	0	1	0	2	AG	0	1	0	1	1
SZD9	1	1	51	19	18	4	GG	1	0	0	2	0	CC	0	0	1	0	2	AG	0	1	0	1	1	CT	0	1	0	1	1	AG	0	1	0	1	1	AG	0	1	0	1	1
SZD10	1	1	42	40	33	14	TT	0	0	1	0	2	AC	0	1	0	1	1	AG	0	1	0	1	1	CT	0	1	0	1	1	AG	0	1	0	1	1	GG	0	0	1	0	2
SZD11	1	1	56	24	22	5	GT	0	1	0	1	1	AC	0	1	0	1	1	AA	1	0	0	2	0	CC	1	0	0	2	0	AG	0	1	0	1	1	AG	0	1	0	1	1
SZD12	1	0	46	28	29	0	GG	1	0	0	2	0	CC	0	0	1	0	2	AA	1	0	0	2	0	CC	1	0	0	2	0	GG	0	0	1	0	2	GG	0	0	1	0	2
SZD13	1	1	47	21	24	10	GT	0	1	0	1	1	CC	0	0	1	0	2	AG	0	1	0	1	1	CC	1	0	0	2	0	GG	0	0	1	0	2	GG	0	0	1	0	2
SZD14	1	1	53	46	12	6	GG	1	0	0	2	0	CC	0	0	1	0	2	GG	0	0	1	0	2	CT	0	1	0	1	1	AG	0	1	0	1	1	GG	0	0	1	0	2
SZD15	1	0	47	31	27	1	GG	1	0	0	2	0	CC	0	0	1	0	2	AA	1	0	0	2	0	CC	1	0	0	2	0	GG	0	0	1	0	2	AG	0	1	0	1	1
SZD16	1	1	62	29	22	12	GT	0	1	0	1	1	AA	1	0	0	2	0	AG	0	1	0	1	1	CT	0	1	0	1	1	GG	0	0	1	0	2	GG	0	0	1	0	2
SZD17	1	0	54	46	32	6	GT	0	1	0	1	1	AA	1	0	0	2	0	AG	0	1	0	1	1	CC	1	0	0	2	0	AG	0	1	0	1	1	GG	0	0	1	0	2
SZD18	1	1	53	40	23	6	GG	1	0	0	2	0	AA	1	0	0	2	0	AG	0	1	0	1	1	CT	0	1	0	1	1	GG	0	0	1	0	2	AG	0	1	0	1	1
SZD19	1	1	62	22	20	16	GT	0	1	0	1	1	AC	0	1	0	1	1	AG	0	1	0	1	1	CC	1	0	0	2	0	GG	0	0	1	0	2	GG	0	0	1	0	2
SZD20	1	1	30	28	25	11	GG	1	0	0	2	0	AA	1	0	0	2	0	AA	1	0	0	2	0	CC	1	0	0	2	0	GG	0	0	1	0	2	GG	0	0	1	0	2
SZD21	1	1	30	29	24	5	GG	1	0	0	2	0	AA	1	0	0	2	0	AA	1	0	0	2	0	CC	1	0	0	2	0	GG	0	0	1	0	2	GG	0	0	1	0	2
SZD22	1	1	44	35	20	6	GG	1	0	0	2	0	AC	0	1	0	1	1	AA	1	0	0	2	0	CC	1	0	0	2	0	GG	0	0	1	0	2	GG	0	0	1	0	2
SZD23	1	1	55	29	18	8	GT	0	1	0	1	1	CC	0	0	1	0	2	AG	0	1	0	1	1	CT	0	1	0	1	1	AG	0	1	0	1	1	AA	1	0	0	2	0
SZD25	1	0	51	33	20	6	GG	1	0	0	2	0	AC	0	1	0	1	1	AA	1	0	0	2	0	CC	1	0	0	2	0	AG	0	1	0	1	1	GG	0	0	1	0	2
SZD26	1	0	50	43	21	6	GT	0	1	0	1	1	CC	0	0	1	0	2	AA	1	0	0	2	0	CC	1	0	0	2	0	GG	0	0	1	0	2	GG	0	0	1	0	2
SZD27	1	0	56	30	10	2	GG	1	0	0	2	0	AA	1	0	0	2	0	AA	1	0	0	2	0	CC	1	0	0	2	0	GG	0	0	1	0	2	AG	0	1	0	1	1
SZD28	1	0	49	33	13	8	GG	1	0	0	2	0	AC	0	1	0	1	1	AG	0	1	0	1	1	CT	0	1	0	1	1	AG	0	1	0	1	1	AG	0	1	0	1	1
SZD29	1	1	30	24	30	10	GG	1	0	0	2	0	AA	1	0	0	2	0	GG	0	0	1	0	2	CT	0	1	0	1	1	GG	0	0	1	0	2	GG	0	0	1	0	2
SZD31	1	1	53	27	23	5	GT	0	1	0	1	1	AC	0	1	0	1	1	AA	1	0	0	2	0	CC	1	0	0	2	0	AG	0	1	0	1	1	AG	0	1	0	1	1
SZD32	1	1	57	31	30	5	GG	1	0	0	2	0	AC	0	1	0	1	1	AG	0	1	0	1	1	CC	1	0	0	2	0	AG	0	1	0	1	1	AG	0	1	0	1	1
SZD35	1	0	47	38	28	3	GT	0	1	0	1	1	CC	0	0	1	0	2	AA	1	0	0	2	0	CC	1	0	0	2	0	GG	0	0	1	0	2	AG	0	1	0	1	1
SZD36	1	0	42	20	15	2	GG	1	0	0	2	0	AC	0	1	0	1	1	AG	0	1	0	1	1	CT	0	1	0	1	1	GG	0	0	1	0	2	AA	1	0	0	2	0
SZD37	1	0	55	27	32	1	GT	0	1	0	1	1	AA	1	0	0	2	0	AG	0	1	0	1	1	CT	0	1	0	1	1	GG	0	0	1	0	2	GG	0	0	1	0	2
SZD38	1	1	57	39	51	7	GG	1	0	0	2	0	AA	1	0	0	2	0	AA	1	0	0	2	0	CC	1	0	0	2	0	GG	0	0	1	0	2	AG	0	1	0	1	1
SZD39	1	1	54	44	30	5	GG	1	0	0	2	0	AA	1	0	0	2	0	AA	1	0	0	2	0	CC	1	0	0	2	0	AG	0	1	0	1	1	AA	1	0	0	2	0
SZD41	1	0	50	36	24	3	GG	1	0	0	2	0	AC	0	1	0	1	1	AG	0	1	0	1	1	CT	0	1	0	1	1	GG	0	0	1	0	2	AG	0	1	0	1	1
SZD42	1	0	37	26	24	9	GG	1	0	0	2	0	AC	0	1	0	1	1	AG	0	1	0	1	1	CT	0	1	0	1	1	GG	0	0	1	0	2	GG	0	0	1	0	2
SZD43	1	1	51	31	32	2	GT	0	1	0	1	1	CC	0	0	1	0	2	GG	0	0	1	0	2	CT	0	1	0	1	1	GG	0	0	1	0	2	AG	0	1	0	1	1
SZD44	1	0	24	24	29	4	GG	1	0	0	2	0	CC	0	0	1	0	2	AA	1	0	0	2	0	CC	1	0	0	2	0	GG	0	0	1	0	2	AG	0	1	0	1	1
SZD45	1	1	52	39	19	10	GG	1	0	0	2	0	CC	0	0	1	0	2	AG	0	1	0	1	1	CC	1	0	0	2	0	AG	0	1	0	1	1	GG	0	0	1	0	2
SZD46	1	0	41	34	31	5	GG	1	0	0	2	0	CC	0	0	1	0	2	AA	1	0	0	2	0	CC	1	0	0	2	0	GG	0	0	1	0	2	AG	0	1	0	1	1
SZD47	1	1	30	27	24	4	GT	0	1	0	1	1	AC	0	1	0	1	1	GG	0	0	1	0	2							GG	0	0	1	0	2	AA	1	0	0	2	0
SZD49	1	0	60	25	29	2	TT	0	0	1	0	2	CC	0	0	1	0	2	AA	1	0	0	2	0	CC	1	0	0	2	0	AG	0	1	0	1	1	AA	1	0	0	2	0
SZD50	1	0	52	46	21	7	GT	0	1	0	1	1	AC	0	1	0	1	1	AA	1	0	0	2	0	CC	1	0	0	2	0	AG	0	1	0	1	1	GG	0	0	1	0	2
SZD51	1	1	59	40	26	8	GT	0	1	0	1	1	AA	1	0	0	2	0	AA	1	0	0	2	0	CC	1	0	0	2	0	AG	0	1	0	1	1	GG	0	0	1	0	2
SZD52	1	1	48	24	26	7	TT	0	0	1	0	2	AC	0	1	0	1	1	AA	1	0	0	2	0	CC	1	0	0	2	0	GG	0	0	1	0	2	GG	0	0	1	0	2
SZD53	1	1	33	30	15	1	GT	0	1	0	1	1	CC	0	0	1	0	2	AG	0	1	0	1	1	CT	0	1	0	1	1	GG	0	0	1	0	2	GG	0	0	1	0	2
SZD54	1	1	67	59	31	8	GG	1	0	0	2	0	CC	0	0	1	0	2	AA	1	0	0	2	0							AG	0	1	0	1	1	GG	0	0	1	0	2
SZD55	1	1	50	42	24	8	GT	0	1	0	1	1	CC	0	0	1	0	2	AG	0	1	0	1	1	CC	1	0	0	2	0	GG	0	0	1	0	2	GG	0	0	1	0	2
SZD56	1	0	20	20	11	4	GT	0	1	0	1	1	AC	0	1	0	1	1	AA	1	0	0	2	0	CC	1	0	0	2	0	GG	0	0	1	0	2	GG	0	0	1	0	2
SZD57	1	0	54	22	26	15	GG	1	0	0	2	0	AA	1	0	0	2	0	AA	1	0	0	2	0	CC	1	0	0	2	0	GG	0	0	1	0	2	GG	0	0	1	0	2
SZD58	1	0	56	31	26	9	GT	0	1	0	1	1	AC	0	1	0	1	1	AA	1	0	0	2	0	CC	1	0	0	2	0	AG	0	1	0	1	1	GG	0	0	1	0	2
SZD59	1	0	22	20	17	11	TT	0	0	1	0	2	AC	0	1	0	1	1	AG	0	1	0	1	1	CC	1	0	0	2	0	AG	0	1	0	1	1	AG	0	1	0	1	1
SZD60	1	0	39	29	25	3	GG	1	0	0	2	0	CC	0	0	1	0	2	AA	1	0	0	2	0	CC	1	0	0	2	0	GG	0	0	1	0	2	AG	0	1	0	1	1
SZD61	1	1	62	27	29	11	GG	1	0	0	2	0	AC	0	1	0	1	1	AG	0	1	0	1	1	CT	0	1	0	1	1	AG	0	1	0	1	1	AG	0	1	0	1	1
SZD62	1	1	61	55	21	5	GG	1	0	0	2	0	CC	0	0	1	0	2	AG	0	1	0	1	1	CT	0	1	0	1	1	GG	0	0	1	0	2	AG	0	1	0	1	1
SZD63	1	1	52	47	23	1	TT	0	0	1	0	2	AC	0	1	0	1	1	AG	0	1	0	1	1	CC	1	0	0	2	0	GG	0	0	1	0	2	GG	0	0	1	0	2
SZD64	1	0	54	53	17	6	GG	1	0	0	2	0	AA	1	0	0	2	0	AG	0	1	0	1	1	CT	0	1	0	1	1	AA	1	0	0	2	0	AG	0	1	0	1	1
SZD66	1	0	42	28	17	6	GG	1	0	0	2	0	CC	0	0	1	0	2	AA	1	0	0	2	0	CC	1	0	0	2	0	GG	0	0	1	0	2	AG	0	1	0	1	1
SZD67	1	1	54	34	26	10	TT	0	0	1	0	2	AC	0	1	0	1	1	AA	1	0	0	2	0	CC	1	0	0	2	0	AG	0	1	0	1	1	AG	0	1	0	1	1
SZD68	1	0	46	45	19	5	GG	1	0	0	2	0	CC	0	0	1	0	2	AA	1	0	0	2	0	CC	1	0	0	2	0	AG	0	1	0	1	1	GG	0	0	1	0	2
SZD69	1	1	33	31	25	10	TT	0	0	1	0	2	AC	0	1	0	1	1	AG	0	1	0	1	1	CC	1	0	0	2	0	AG	0	1	0	1	1	GG	0	0	1	0	2
SZD70	1	1	52	44	15	5	GT	0	1	0	1	1	CC	0	0	1	0	2	AG	0	1	0	1	1	CT	0	1	0	1	1	AG	0	1	0	1	1	GG	0	0	1	0	2
SZD72	1	0	59	33	18	5	GT	0	1	0	1	1	AC	0	1	0	1	1	AA	1	0	0	2	0	CC	1	0	0	2	0	GG	0	0	1	0	2	AG	0	1	0	1	1
SZD73	1	0	62		31	4	GG	1	0	0	2	0	CC	0	0	1	0	2	AG	0	1	0	1	1	CC	1	0	0	2	0	AG	0	1	0	1	1	GG	0	0	1	0	2
SZD74	1	0	54	53	18	11	TT	0	0	1	0	2	CC	0	0	1	0	2	GG	0	0	1	0	2	CC	1	0	0	2	0	AG	0	1	0	1	1	AG	0	1	0	1	1
SZD75	1	0	62	59	27	5	GT	0	1	0	1	1	AA	1	0	0	2	0	AG	0	1	0	1	1	CT	0	1	0	1	1	AG	0	1	0	1	1	AG	0	1	0	1	1
SZD76	1	0	58	47	22	9	GT	0	1	0	1	1	CC	0	0	1	0	2	AA	1	0	0	2	0	CC	1	0	0	2	0	GG	0	0	1	0	2	AG	0	1	0	1	1
SZD77	1	1	60	55	31	18	GT	0	1	0	1	1	AC	0	1	0	1	1	AG	0	1	0	1	1	CC	1	0	0	2	0	GG	0	0	1	0	2	AG	0	1	0	1	1
SZD78	1	0	49	31	21	4	GG	1	0	0	2	0	AA	1	0	0	2	0	AA	1	0	0	2	0	CC	1	0	0	2	0	GG	0	0	1	0	2	AG	0	1	0	1	1
SZD79	1	0	52	42	16	0	GG	1	0	0	2	0	AA	1	0	0	2	0	AG	0	1	0	1	1	CT	0	1	0	1	1	AG	0	1	0	1	1	AG	0	1	0	1	1
SZD80	1	0	45	45	26	7	GT	0	1	0	1	1	AC	0	1	0	1	1	GG	0	0	1	0	2	CT	0	1	0	1	1	GG	0	0	1	0	2	GG	0	0	1	0	2
SZD81	1	0	44	40	24	4	GG	1	0	0	2	0	AC	0	1	0	1	1	AA	1	0	0	2	0	CC	1	0	0	2	0	AG	0	1	0	1	1	AG	0	1	0	1	1
SZD82	1	1	53	29	17	11	GT	0	1	0	1	1	CC	0	0	1	0	2	AA	1	0	0	2	0	CC	1	0	0	2	0	AG	0	1	0	1	1	GG	0	0	1	0	2
SZD83	1	1	40	27	17	3	GG	1	0	0	2	0	AC	0	1	0	1	1	AG	0	1	0	1	1	CC	1	0	0	2	0	AA	1	0	0	2	0	AA	1	0	0	2	0
SZD84	1	1	48	40	27	14	GG	1	0	0	2	0	AC	0	1	0	1	1	AG	0	1	0	1	1	CT	0	1	0	1	1	AA	1	0	0	2	0	GG	0	0	1	0	2
SZD85	1	1	47	45	29	6	GG	1	0	0	2	0	AC	0	1	0	1	1	GG	0	0	1	0	2	CC	1	0	0	2	0	AG	0	1	0	1	1	GG	0	0	1	0	2
SZD86	1	0	45	30	28	12	GT	0	1	0	1	1	AC	0	1	0	1	1	AG	0	1	0	1	1	CC	1	0	0	2	0	GG	0	0	1	0	2	GG	0	0	1	0	2
SZD87	1	1	21	20	17	0	GG	1	0	0	2	0	AA	1	0	0	2	0	GG	0	0	1	0	2	CC	1	0	0	2	0	AG	0	1	0	1	1	GG	0	0	1	0	2
SZD88	1	1	54	51	17	4	GG	1	0	0	2	0	AC	0	1	0	1	1	AG	0	1	0	1	1	CT	0	1	0	1	1	GG	0	0	1	0	2	GG	0	0	1	0	2
SZD89	1	1	52	44	17	2	GT	0	1	0	1	1	AC	0	1	0	1	1	AG	0	1	0	1	1	CC	1	0	0	2	0	GG	0	0	1	0	2	GG	0	0	1	0	2
SZD91	1	0	60	29	25	6	GT	0	1	0	1	1	AA	1	0	0	2	0	AA	1	0	0	2	0	CC	1	0	0	2	0	AG	0	1	0	1	1	GG	0	0	1	0	2
SZD94	1	1	23	20	23	11	GG	1	0	0	2	0	AC	0	1	0	1	1	AA	1	0	0	2	0	CC	1	0	0	2	0	GG	0	0	1	0	2	AA	1	0	0	2	0
SZD97	1	0	41	40	24	8							AC	0	1	0	1	1	AG	0	1	0	1	1	CC	1	0	0	2	0	GG	0	0	1	0	2	GG	0	0	1	0	2
SZD98	1	1	61	58	24	10							AA	1	0	0	2	0	AA	1	0	0	2	0	TT	0	0	1	0	2							AG	0	1	0	1	1
SZD99	1	1	33	29	34	14	GT	0	1	0	1	1	AA	1	0	0	2	0	AG	0	1	0	1	1							AA	1	0	0	2	0	GG	0	0	1	0	2
SZD100	1	1	51	45	28	12	GT	0	1	0	1	1	CC	0	0	1	0	2	GG	0	0	1	0	2							GG	0	0	1	0	2	GG	0	0	1	0	2
SZD101	1	1	39	31	24	7	GG	1	0	0	2	0	AC	0	1	0	1	1	AA	1	0	0	2	0	CC	1	0	0	2	0	AG	0	1	0	1	1	AG	0	1	0	1	1
SZD102	1	0	52	46	32	2	GG	1	0	0	2	0	AC	0	1	0	1	1	AG	0	1	0	1	1	CC	1	0	0	2	0	GG	0	0	1	0	2	GG	0	0	1	0	2
SZD103	1	1	31	28	22	6	GG	1	0	0	2	0	AC	0	1	0	1	1	AA	1	0	0	2	0	CC	1	0	0	2	0	GG	0	0	1	0	2	AG	0	1	0	1	1
SZD104	1	0	52	39	35	9	GT	0	1	0	1	1	AC	0	1	0	1	1	AA	1	0	0	2	0	CC	1	0	0	2	0	AG	0	1	0	1	1	GG	0	0	1	0	2
SZD105	1	0	41	40	26	2	GT	0	1	0	1	1	AC	0	1	0	1	1	AG	0	1	0	1	1	CT	0	1	0	1	1	AG	0	1	0	1	1	AG	0	1	0	1	1
SZD106	1	0	57	28	26	5	GG	1	0	0	2	0	AC	0	1	0	1	1	AG	0	1	0	1	1	CT	0	1	0	1	1	AA	1	0	0	2	0	AG	0	1	0	1	1
SZD107	1	1	40	33	23	6	GT	0	1	0	1	1	CC	0	0	1	0	2	AG	0	1	0	1	1	CT	0	1	0	1	1	AG	0	1	0	1	1
SZD108	1	1	55	49	19	8	GG	1	0	0	2	0	AC	0	1	0	1	1	AG	0	1	0	1	1	CT	0	1	0	1	1	AG	0	1	0	1	1	AG	0	1	0	1	1
SZD109	1	1	44	44	25	4	GT	0	1	0	1	1	AA	1	0	0	2	0	AG	0	1	0	1	1	CT	0	1	0	1	1	AG	0	1	0	1	1	GG	0	0	1	0	2
SZD110	1	1	52	50	27	13	GT	0	1	0	1	1	AC	0	1	0	1	1	GG	0	0	1	0	2	CT	0	1	0	1	1	GG	0	0	1	0	2	GG	0	0	1	0	2
SZD111	1	0	43	24	5	6	GG	1	0	0	2	0	AC	0	1	0	1	1	AA	1	0	0	2	0	CC	1	0	0	2	0	AG	0	1	0	1	1	AG	0	1	0	1	1
SZD112	1	0	51	42	36	17	GG	1	0	0	2	0	AC	0	1	0	1	1	AA	1	0	0	2	0	CC	1	0	0	2	0	AG	0	1	0	1	1	AG	0	1	0	1	1
SZD113	1	0	56	50	26	1	GT	0	1	0	1	1	CC	0	0	1	0	2	AA	1	0	0	2	0	CC	1	0	0	2	0	AA	1	0	0	2	0	GG	0	0	1	0	2
SZD114	1	0	57	52	21	4	GG	1	0	0	2	0	AC	0	1	0	1	1	AG	0	1	0	1	1	CC	1	0	0	2	0	AG	0	1	0	1	1	GG	0	0	1	0	2
SZD115	1	1	60	35	21	7	GG	1	0	0	2	0	AC	0	1	0	1	1	AG	0	1	0	1	1	CC	1	0	0	2	0	GG	0	0	1	0	2	AG	0	1	0	1	1
SZD116	1	0	51	44	26	10	GT	0	1	0	1	1	AC	0	1	0	1	1	AG	0	1	0	1	1	CC	1	0	0	2	0	GG	0	0	1	0	2	GG	0	0	1	0	2
SZD117	1	1	53	42	20	4	GG	1	0	0	2	0	AC	0	1	0	1	1	AA	1	0	0	2	0	CC	1	0	0	2	0	AG	0	1	0	1	1
SZD118	1	1	60	49	30	4	GG	1	0	0	2	0	CC	0	0	1	0	2	AG	0	1	0	1	1	CC	1	0	0	2	0	AG	0	1	0	1	1	AG	0	1	0	1	1
SZD119	1	1	35	30	29	4	TT	0	0	1	0	2	CC	0	0	1	0	2	AG	0	1	0	1	1	CT	0	1	0	1	1	GG	0	0	1	0	2	GG	0	0	1	0	2
SZD120	1	1	29	26	18	10	TT	0	0	1	0	2	CC	0	0	1	0	2	AA	1	0	0	2	0	CC	1	0	0	2	0	AG	0	1	0	1	1	GG	0	0	1	0	2
SZD122	1	1	57	48	22	0	GG	1	0	0	2	0	CC	0	0	1	0	2							CC	1	0	0	2	0	GG	0	0	1	0	2	AG	0	1	0	1	1
SZD123	1	0	65	50	27	8	GG	1	0	0	2	0	AC	0	1	0	1	1	AA	1	0	0	2	0	CC	1	0	0	2	0							GG	0	0	1	0	2
SZD124	1	0	48	38	26	1	GG	1	0	0	2	0	AC	0	1	0	1	1	AA	1	0	0	2	0	CC	1	0	0	2	0	AG	0	1	0	1	1
SZD125	1	0	54	33	25	5	GG	1	0	0	2	0	CC	0	0	1	0	2	AA	1	0	0	2	0	CC	1	0	0	2	0	GG	0	0	1	0	2	AG	0	1	0	1	1
SZD126	1	0	49	28	25	5							CC	0	0	1	0	2	AA	1	0	0	2	0	CC	1	0	0	2	0	AG	0	1	0	1	1	GG	0	0	1	0	2
SZD127	1	0	53	50	27	7	GG	1	0	0	2	0	AA	1	0	0	2	0	GG	0	0	1	0	2	CT	0	1	0	1	1	AG	0	1	0	1	1
SZD128	1	1	32	30	21	7	GG	1	0	0	2	0	AC	0	1	0	1	1	AA	1	0	0	2	0	CC	1	0	0	2	0	AG	0	1	0	1	1	AG	0	1	0	1	1
SZD129	1	0	31	29	13	5	GG	1	0	0	2	0	AC	0	1	0	1	1	AG	0	1	0	1	1	CT	0	1	0	1	1	GG	0	0	1	0	2	GG	0	0	1	0	2
SZD130	1	1	57	53	31	16	GG	1	0	0	2	0	AC	0	1	0	1	1	AA	1	0	0	2	0	CC	1	0	0	2	0	AG	0	1	0	1	1	AG	0	1	0	1	1
SZD131	1	1	53	50	28	8							AC	0	1	0	1	1	AG	0	1	0	1	1	CT	0	1	0	1	1	GG	0	0	1	0	2	AG	0	1	0	1	1
SZD132	1	1	61	56	30	12	GT	0	1	0	1	1	AC	0	1	0	1	1	AA	1	0	0	2	0	CC	1	0	0	2	0	GG	0	0	1	0	2	AG	0	1	0	1	1
SZD133	1	0	54	44	15	5	GT	0	1	0	1	1	AC	0	1	0	1	1	AA	1	0	0	2	0	CC	1	0	0	2	0	AA	1	0	0	2	0	AG	0	1	0	1	1
SZD134	1	0	49	42	25	9	TT	0	0	1	0	2	AA	1	0	0	2	0	AG	0	1	0	1	1	CC	1	0	0	2	0	AG	0	1	0	1	1	AG	0	1	0	1	1
SZD135	1	0	48	42	18	4	GG	1	0	0	2	0	AC	0	1	0	1	1	GG	0	0	1	0	2	CT	0	1	0	1	1	AG	0	1	0	1	1	AG	0	1	0	1	1
SZD136	1	0	53	29	24	10	GG	1	0	0	2	0	AC	0	1	0	1	1	GG	0	0	1	0	2	CC	1	0	0	2	0	AG	0	1	0	1	1	GG	0	0	1	0	2
SZD137	1	1	56	40	19	3	GT	0	1	0	1	1	AC	0	1	0	1	1	AG	0	1	0	1	1	CC	1	0	0	2	0	AG	0	1	0	1	1	GG	0	0	1	0	2
SZD138	1	1	51	42	22	8	GT	0	1	0	1	1	CC	0	0	1	0	2	AG	0	1	0	1	1	CC	1	0	0	2	0	GG	0	0	1	0	2	GG	0	0	1	0	2
SZD139	1	0	52	51	19	3	GT	0	1	0	1	1	AC	0	1	0	1	1	AG	0	1	0	1	1	CT	0	1	0	1	1	AG	0	1	0	1	1	GG	0	0	1	0	2
SZD140	1	1	48	41	27	7	GG	1	0	0	2	0	AC	0	1	0	1	1	AG	0	1	0	1	1	CC	1	0	0	2	0	AG	0	1	0	1	1
SZD141	1	1	35	30	19	4	GG	1	0	0	2	0	AC	0	1	0	1	1	GG	0	0	1	0	2	CT	0	1	0	1	1	AA	1	0	0	2	0	GG	0	0	1	0	2
SZD142	1	0	56	39	21	7	GG	1	0	0	2	0	AC	0	1	0	1	1	GG	0	0	1	0	2	CT	0	1	0	1	1	AG	0	1	0	1	1	AG	0	1	0	1	1
SZD143	1	0	28	27	29	6	GT	0	1	0	1	1	AC	0	1	0	1	1	AG	0	1	0	1	1	CT	0	1	0	1	1	AG	0	1	0	1	1	GG	0	0	1	0	2
SZD144	1	0	55	45	21	4							CC	0	0	1	0	2	GG	0	0	1	0	2	CT	0	1	0	1	1	AG	0	1	0	1	1	AA	1	0	0	2	0
SZD145	1	0	47	32	16	8	GG	1	0	0	2	0	AC	0	1	0	1	1	GG	0	0	1	0	2	CT	0	1	0	1	1	AG	0	1	0	1	1	AG	0	1	0	1	1
SZD146	1	1	41	40	21	9	GT	0	1	0	1	1	AC	0	1	0	1	1	AG	0	1	0	1	1	CT	0	1	0	1	1	AG	0	1	0	1	1
SZD147	1	0	57	50	28	17	TT	0	0	1	0	2	AC	0	1	0	1	1	AG	0	1	0	1	1	CC	1	0	0	2	0	AG	0	1	0	1	1	AG	0	1	0	1	1
SZD148	1	0	63	22	23	8							AC	0	1	0	1	1	AG	0	1	0	1	1	CC	1	0	0	2	0	AG	0	1	0	1	1	AG	0	1	0	1	1
SZD150	1	1	60	28	26	13							AC	0	1	0	1	1	AG	0	1	0	1	1	CC	1	0	0	2	0	GG	0	0	1	0	2
SZD151	1	0	58	25	20	2	GT	0	1	0	1	1	AC	0	1	0	1	1	AG	0	1	0	1	1	CC	1	0	0	2	0	AG	0	1	0	1	1	GG	0	0	1	0	2
SZD152	1	1	36	30	27	6	GG	1	0	0	2	0	CC	0	0	1	0	2	AG	0	1	0	1	1	CC	1	0	0	2	0	GG	0	0	1	0	2	AG	0	1	0	1	1
SZD153	1	1	54	51	20	4	TT	0	0	1	0	2	AA	1	0	0	2	0	GG	0	0	1	0	2	CC	1	0	0	2	0	AG	0	1	0	1	1	GG	0	0	1	0	2
SZD154	1	1	47	36	33	8	GG	1	0	0	2	0	AC	0	1	0	1	1	AA	1	0	0	2	0	CC	1	0	0	2	0	AA	1	0	0	2	0	AG	0	1	0	1	1
SZD155	1	1	41	20	22	6	GT	0	1	0	1	1	AC	0	1	0	1	1	AG	0	1	0	1	1	CC	1	0	0	2	0	AA	1	0	0	2	0	GG	0	0	1	0	2
SZD156	1	0	56	32	33	7	GG	1	0	0	2	0	AC	0	1	0	1	1	AA	1	0	0	2	0	CC	1	0	0	2	0	GG	0	0	1	0	2	AG	0	1	0	1	1
SZD157	1	0	56	37	32	5	GG	1	0	0	2	0	CC	0	0	1	0	2	AG	0	1	0	1	1	CC	1	0	0	2	0	GG	0	0	1	0	2	GG	0	0	1	0	2
SZD158	1	0	31	21	24	3	GT	0	1	0	1	1	AC	0	1	0	1	1	AA	1	0	0	2	0	CC	1	0	0	2	0	AA	1	0	0	2	0	GG	0	0	1	0	2
SZD159	1	0	51	35	16	1	GT	0	1	0	1	1	AA	1	0	0	2	0	AA	1	0	0	2	0	CC	1	0	0	2	0	GG	0	0	1	0	2	AG	0	1	0	1	1
SZD160	1	1	62	30	26	6	GT	0	1	0	1	1	AC	0	1	0	1	1	AG	0	1	0	1	1	CT	0	1	0	1	1	AG	0	1	0	1	1	AG	0	1	0	1	1
SZD161	1	1	60	53	28	11	GG	1	0	0	2	0	AC	0	1	0	1	1	AA	1	0	0	2	0	CC	1	0	0	2	0	GG	0	0	1	0	2	AG	0	1	0	1	1
SZD162	1	1	49	40	30	6	GG	1	0	0	2	0	AA	1	0	0	2	0	AG	0	1	0	1	1	CC	1	0	0	2	0	AG	0	1	0	1	1	AG	0	1	0	1	1
SZD163	1	0	50	31	24	11	GG	1	0	0	2	0	AC	0	1	0	1	1	AA	1	0	0	2	0	CC	1	0	0	2	0	GG	0	0	1	0	2	GG	0	0	1	0	2
SZD164	1	1	48	36	15	2	GG	1	0	0	2	0	AA	1	0	0	2	0	AA	1	0	0	2	0	CC	1	0	0	2	0	AG	0	1	0	1	1	GG	0	0	1	0	2
SZD165	1	1	42	27	22	1	GG	1	0	0	2	0	AC	0	1	0	1	1	AG	0	1	0	1	1	CT	0	1	0	1	1	GG	0	0	1	0	2	GG	0	0	1	0	2
SZD166	1	1	55	21	17	5	TT	0	0	1	0	2	AC	0	1	0	1	1	AG	0	1	0	1	1	CC	1	0	0	2	0	GG	0	0	1	0	2	AG	0	1	0	1	1
SZD167	1	1	46	42	24	5	GG	1	0	0	2	0	AC	0	1	0	1	1	AA	1	0	0	2	0	CC	1	0	0	2	0	AG	0	1	0	1	1	AA	1	0	0	2	0
SZD168	1	0	37	30	25	3	GG	1	0	0	2	0	AC	0	1	0	1	1	AA	1	0	0	2	0	CC	1	0	0	2	0	GG	0	0	1	0	2	AA	1	0	0	2	0
SZD169	1	1	61	59	29	7	GG	1	0	0	2	0	CC	0	0	1	0	2	AA	1	0	0	2	0	CC	1	0	0	2	0	AA	1	0	0	2	0	AG	0	1	0	1	1
SZD170	1	1	60	39	15	5	TT	0	0	1	0	2	AC	0	1	0	1	1	AA	1	0	0	2	0	CC	1	0	0	2	0	GG	0	0	1	0	2	GG	0	0	1	0	2
SZD171	1	0	57	20	20	7	GT	0	1	0	1	1	CC	0	0	1	0	2	AG	0	1	0	1	1	CC	1	0	0	2	0	GG	0	0	1	0	2	AA	1	0	0	2	0
SZD172	1	0	65	40	29	8							AC	0	1	0	1	1	AA	1	0	0	2	0	CC	1	0	0	2	0	AG	0	1	0	1	1	AG	0	1	0	1	1
SZD173	1	1	50	49	20	6	GG	1	0	0	2	0	AA	1	0	0	2	0	AA	1	0	0	2	0	CC	1	0	0	2	0	GG	0	0	1	0	2	AG	0	1	0	1	1
SZD174	1	0	61	60	24	9	GG	1	0	0	2	0	AC	0	1	0	1	1	AA	1	0	0	2	0	CC	1	0	0	2	0	AG	0	1	0	1	1	AG	0	1	0	1	1
SZD175	1	0	52	34	14	0	GT	0	1	0	1	1	AA	1	0	0	2	0	AG	0	1	0	1	1	CC	1	0	0	2	0	AG	0	1	0	1	1	GG	0	0	1	0	2
SZD176	1	1	67	43	31	10	TT	0	0	1	0	2	AC	0	1	0	1	1	AG	0	1	0	1	1	CT	0	1	0	1	1	GG	0	0	1	0	2	GG	0	0	1	0	2
SZD177	1	0	49	35	27	11	GG	1	0	0	2	0	AC	0	1	0	1	1	AA	1	0	0	2	0	CC	1	0	0	2	0	AG	0	1	0	1	1
SZD178	1	0	57	25	27	5	GG	1	0	0	2	0	AA	1	0	0	2	0	AG	0	1	0	1	1	CT	0	1	0	1	1	AG	0	1	0	1	1	AG	0	1	0	1	1
SZD179	1	0	55	27	26	4	GG	1	0	0	2	0	CC	0	0	1	0	2	AG	0	1	0	1	1	CC	1	0	0	2	0	GG	0	0	1	0	2	GG	0	0	1	0	2
SZD180	1	0	44	25	25	7	TT	0	0	1	0	2	AA	1	0	0	2	0	AA	1	0	0	2	0	CC	1	0	0	2	0	GG	0	0	1	0	2	GG	0	0	1	0	2
SZD181	1	1	63	42	30	5	GT	0	1	0	1	1	AC	0	1	0	1	1	AA	1	0	0	2	0	CC	1	0	0	2	0	GG	0	0	1	0	2	GG	0	0	1	0	2
SZD182	1	1	42	21	19	2	GG	1	0	0	2	0	AA	1	0	0	2	0	AA	1	0	0	2	0	CC	1	0	0	2	0	AG	0	1	0	1	1	GG	0	0	1	0	2
SZD183	1	1	48	45	18	7	GG	1	0	0	2	0	AA	1	0	0	2	0	AA	1	0	0	2	0	CC	1	0	0	2	0	GG	0	0	1	0	2	AG	0	1	0	1	1
SZD184	1	1	45	43	31	5	GG	1	0	0	2	0	AC	0	1	0	1	1	AG	0	1	0	1	1	CC	1	0	0	2	0	GG	0	0	1	0	2	AG	0	1	0	1	1
SZD185	1	0	45	22	20	5	GT	0	1	0	1	1	AC	0	1	0	1	1	AG	0	1	0	1	1	CT	0	1	0	1	1	GG	0	0	1	0	2	AG	0	1	0	1	1
SZD186	1	1	36	30	18	7							AA	1	0	0	2	0	GG	0	0	1	0	2	TT	0	0	1	0	2	GG	0	0	1	0	2	AA	1	0	0	2	0
SZD187	1	0	54	41	16	4	GG	1	0	0	2	0	AC	0	1	0	1	1	AA	1	0	0	2	0	CC	1	0	0	2	0	GG	0	0	1	0	2	AA	1	0	0	2	0
SZD188	1	1	50	39	22	6	TT	0	0	1	0	2	AC	0	1	0	1	1	AA	1	0	0	2	0	CC	1	0	0	2	0	GG	0	0	1	0	2	GG	0	0	1	0	2
SZD189	1	0	55	34	29	6	GT	0	1	0	1	1	AA	1	0	0	2	0	AG	0	1	0	1	1	CT	0	1	0	1	1	AA	1	0	0	2	0	AG	0	1	0	1	1
SZD190	1	0	66	30	15	4	GG	1	0	0	2	0	AC	0	1	0	1	1	AG	0	1	0	1	1	CT	0	1	0	1	1	GG	0	0	1	0	2	GG	0	0	1	0	2
SZD191	1	0	58	32	14	6	GG	1	0	0	2	0	AC	0	1	0	1	1	AA	1	0	0	2	0	CC	1	0	0	2	0	AA	1	0	0	2	0	GG	0	0	1	0	2
SZD192	1	1	48	35	19	6	GT	0	1	0	1	1	CC	0	0	1	0	2	GG	0	0	1	0	2	CC	1	0	0	2	0	GG	0	0	1	0	2	GG	0	0	1	0	2
SZD194	1	1	54	25	23	10	TT	0	0	1	0	2	CC	0	0	1	0	2	AG	0	1	0	1	1	CT	0	1	0	1	1	GG	0	0	1	0	2	AG	0	1	0	1	1
SZD195	1	0	50	27	19	6	GT	0	1	0	1	1	CC	0	0	1	0	2	AA	1	0	0	2	0	CC	1	0	0	2	0	GG	0	0	1	0	2	AA	1	0	0	2	0
SZD196	1	0	61	29	28	12	GG	1	0	0	2	0	CC	0	0	1	0	2	AA	1	0	0	2	0	CC	1	0	0	2	0	AG	0	1	0	1	1	AG	0	1	0	1	1
SZD197	1	1	64	58	20	0	GG	1	0	0	2	0	AC	0	1	0	1	1	AG	0	1	0	1	1	CT	0	1	0	1	1	GG	0	0	1	0	2	GG	0	0	1	0	2
SZD198	1	0	37	36	15	4	GG	1	0	0	2	0	AC	0	1	0	1	1	GG	0	0	1	0	2	CC	1	0	0	2	0	AG	0	1	0	1	1	GG	0	0	1	0	2
SZD199	1	0	54	42	18	2	GG	1	0	0	2	0	CC	0	0	1	0	2	AA	1	0	0	2	0	CC	1	0	0	2	0	AA	1	0	0	2	0	GG	0	0	1	0	2
SZD200	1						GG	1	0	0	2	0	AA	1	0	0	2	0	AA	1	0	0	2	0							AG	0	1	0	1	1	AG	0	1	0	1	1
SZD201	1	0	41	36	27	6	GG	1	0	0	2	0	CC	0	0	1	0	2	AA	1	0	0	2	0							GG	0	0	1	0	2	GG	0	0	1	0	2
SZD203	1	0	47	30	14	4	GT	0	1	0	1	1	CC	0	0	1	0	2	AA	1	0	0	2	0							AG	0	1	0	1	1	AA	1	0	0	2	0
SZD204	1	0	44	19	21	11	TT	0	0	1	0	2	CC	0	0	1	0	2	AA	1	0	0	2	0							AG	0	1	0	1	1	GG	0	0	1	0	2
SZD207	1	0	29	22	24	8	GG	1	0	0	2	0	AC	0	1	0	1	1	AG	0	1	0	1	1							AG	0	1	0	1	1	AG	0	1	0	1	1
SZD208	1	1	57	31	24	10	GT	0	1	0	1	1	AC	0	1	0	1	1	AG	0	1	0	1	1							GG	0	0	1	0	2	AA	1	0	0	2	0
SZD209	1	0	65	39	34	14	GT	0	1	0	1	1							GG	0	0	1	0	2	CT	0	1	0	1	1	AG	0	1	0	1	1	AG	0	1	0	1	1
